# Supplementary material for: Comprehensive Genomic Characterization of Cronobacter sakazakii Isolates from Infant Formula Processing Facilities Using Whole-Genome Sequencing
Source: MDPI journal article supplement (doi:10.3390/microorganisms11112749), 2023-11-11
Supplement: s1 [file s1]

| Supplementary Table S5. Details of intact Phage sequences identified by PHASTER software in the 18 <i>Cronobacter sakazakii</i> isolates genome. |        |         |              |       |                |                 |                                        |        |
|--------------------------------------------------------------------------------------------------------------------------------------------------|--------|---------|--------------|-------|----------------|-----------------|----------------------------------------|--------|
| Isolate                                                                                                                                          | Region | Lenght  | Completeness | Score | Total proteins | Region Position | Most common phage                      | GC%    |
| CF1154                                                                                                                                           | 1      | 34.6Kb  | intact       | 130   | 40             | 82112-116797    | PHAGE_Salmon_118970_sal3_NC_031940(11) | 50.74% |
|                                                                                                                                                  | 1      | 34.4Kb  | intact       | 110   | 39             | 81816-116313    | PHAGE_Salmon_118970_sal3_NC_031940(10) | 50.54% |
| CF1155                                                                                                                                           | 4      | 102Kb   | intact       | 150   | 133            | 1-102072        | PHAGE_Salmon_SSU5_NC_018843(91)        | 51.15% |
|                                                                                                                                                  | 1      | 46Kb    | intact       | 150   | 63             | 249680-295734   | PHAGE_Salmon_118970_sal3_NC_031940(10) | 55.03% |
| CF1156                                                                                                                                           | 4      | 42.4Kb  | intact       | 98    | 56             | 89733-132186    | PHAGE_Enteroto_Tyrion_NC_031077(34)    | 54.91% |
|                                                                                                                                                  | 1      | 46Kb    | intact       | 150   | 65             | 354841-400895   | PHAGE_Salmon_118970_sal3_NC_031940(10) | 55.03% |
| CF1157                                                                                                                                           | 3      | 42.4Kb  | intact       | 98    | 56             | 89733-132186    | PHAGE_Enteroto_Tyrion_NC_031077(34)    | 54.91% |
| CF1158                                                                                                                                           | 1      | 46Kb    | intact       | 150   | 63             | 216579-262633   | PHAGE_Salmon_118970_sal3_NC_031940(10) | 55.03% |
|                                                                                                                                                  | 5      | 42.4Kb  | intact       | 98    | 56             | 89805-132258    | PHAGE_Enteroto_Tyrion_NC_031077(34)    | 54.91% |
| CF1159                                                                                                                                           | 1      | 66.8Kb  | intact       | 150   | 66             | 8964-75809      | PHAGE_Salmon_118970_sal3_NC_031940(10) | 56.27% |
|                                                                                                                                                  | 2      | 42.4Kb  | intact       | 98    | 56             | 89733-132186    | PHAGE_Enteroto_Tyrion_NC_031077(34)    | 54.91% |
| CF1160                                                                                                                                           | 1      | 47.8Kb  | intact       | 150   | 42             | 381268-429096   | PHAGE_Cronob_phiES15_NC_018454(9)      | 52.29% |
|                                                                                                                                                  | 3      | 44.4Kb  | intact       | 140   | 40             | 119-44576       | PHAGE_Salmon_118970_sal3_NC_031940(13) | 54.49% |
| CF1161                                                                                                                                           | 7      | 16.7Kb  | intact       | 130   | 21             | 97-16887        | PHAGE_Enteroto_mEp235_NC_019708(7)     | 55.17% |
| CF1169                                                                                                                                           | -      | -       | -            | -     | -              | -               | -                                      | -      |
| CF1297                                                                                                                                           | 3      | 102.5Kb | intact       | 150   | 125            | 715-103309      | PHAGE_Salmon_SSU5_NC_018843(92)        | 50.92% |
|                                                                                                                                                  | 5      | 48Kb    | intact       | 150   | 60             | 59-48139        | PHAGE_Aeromo_vB_AsaM_56_NC_019527(12)  | 53.11% |
| CF1304                                                                                                                                           | 2      | 26.5Kb  | intact       | 120   | 38             | 93876-120460    | PHAGE_Salmon_118970_sal3_NC_031940(17) | 53.55% |
|                                                                                                                                                  | 4      | 31Kb    | intact       | 94    | 37             | 114061-145080   | PHAGE_Cronob_ESSI_2_NC_047854(27)      | 53.37% |
|                                                                                                                                                  | 6      | 32.4Kb  | intact       | 150   | 38             | 28856-61310     | PHAGE_Escher_pro483_NC_028943(12)      | 54.59% |
| CF1322                                                                                                                                           | 1      | 81.8Kb  | intact       | 150   | 99             | 15814-97667     | PHAGE_Salmon_SSU5_NC_018843(75)        | 51.76% |
|                                                                                                                                                  | 2      | 50.2Kb  | intact       | 150   | 58             | 11006-612991    | PHAGE_Aeromo_vB_AsaM_56_NC_019527(12)  | 53.46% |

|        |   |         |        |     |     |               |                                        |        |
|--------|---|---------|--------|-----|-----|---------------|----------------------------------------|--------|
| FS1328 | 3 | 104.3Kb | intact | 150 | 128 | 3-104381      | PHAGE_Salmon_SSU5_NC_018843(92)        | 50.86% |
|        | 8 | 22.9Kb  | intact | 100 | 38  | 20-22960      | PHAGE_Aeromo_vB_AsaM_56_NC_019527(11)  | 51.85% |
| FS1362 | 3 | 31Kb    | intact | 94  | 34  | 67169-98188   | PHAGE_Cronob_ESSI_2_NC_047854(27)      | 53.37% |
|        | 4 | 46.9Kb  | intact | 150 | 55  | 481566-128472 | PHAGE_Salmon_118970_sal3_NC_031940(18) | 51.71% |
|        | 5 | 32.4Kb  | intact | 150 | 40  | 43618-76072   | PHAGE_Erwini_EtG_NC_047833(12)         | 54.58% |
| FS1370 | 2 | 31Kb    | intact | 94  | 37  | 610239-641258 | PHAGE_Cronob_ESSI_2_NC_047854(27)      | 53.37% |
|        | 4 | 38.3Kb  | intact | 150 | 48  | 413613-451964 | PHAGE_Salmon_118970_sal3_NC_031940(18) | 50.66% |
| FS1377 | 3 | 100.1Kb | intact | 150 | 127 | 4422-104541   | PHAGE_Salmon_SSU5_NC_018843(92)        | 50.63% |
| FS2786 | 1 | 34.6Kb  | intact | 130 | 40  | 81816-116501  | PHAGE_Salmon_118970_sal3_NC_031940(11) | 50.74% |
| FS2788 | 1 | 34.4Kb  | intact | 110 | 39  | 81816-116313  | PHAGE_Salmon_118970_sal3_NC_031940(10) | 50.54% |
|        | 4 | 101.9Kb | intact | 150 | 130 | 137-102074    | PHAGE_Salmon_SSU5_NC_018843(95)        | 51.15% |
