# Supplementary material for: Comprehensive Genomic Characterization of Cronobacter sakazakii Isolates from Infant Formula Processing Facilities Using Whole-Genome Sequencing
Source: MDPI journal article supplement (doi:10.3390/microorganisms11112749), 2023-11-11
Supplement: s1 [file s1]

**Supplementary Table S2.** Metadata for Study Isolates and 96 Isolates Retrieved from the NCBI Database

| Isolates        | ST  | Type of samples       | Date of isolation | Country      |
|-----------------|-----|-----------------------|-------------------|--------------|
| Reference       | 1   | PIF                   | 2000              | USA          |
| GCA_003207095.1 | 1   | Clinical              | 2006              | New zealand  |
| GCA_013186105.1 | 1   | PIF                   | 2011              | China        |
| GCA_002942365.1 | 446 | flour                 | 2006              | USA          |
| CFS2788         | 1   | Raw material          | 2011              | Ireland      |
| CFS2786         | 1   | Raw material          | 2011              | Ireland      |
| GCA_003207275.1 | 1   | Clinical              | 2005              | New zealand  |
| GCA_013425995.1 | 1   | Clinical              | 2017              | Poland       |
| GCA_011605495.1 | 1   | PIF                   | 2018              | China        |
| GCA_002974645.1 | 1   | flour                 | 2004              | USA          |
| GCA_016576925.1 | 1   | Clinical              | 2018              | USA          |
| GCA_011605555.1 | 1   | PIF                   | 2018              | China        |
| GCF_011605525.1 | 1   | PIF                   | 2018              | China        |
| GCA_011605585.1 | 1   | PIF                   | 2018              | China        |
| GCA_011605455.1 | 1   | PIF                   | 2018              | China        |
| CFS1160         | 1   | Environmental samples | 2012              | Ireland      |
| GCA_025630735.1 | 1   | soil                  | 2012              | Saudi Arabia |
| CFS1155         | 1   | Environmental samples | 2012              | Ireland      |
| GCA_030026205.1 | 1   | PIF environment       | 2018              | Ireland      |
| CFS1169         | 1   | Environmental samples | 2012              | Ireland      |
| CFS1154         | 1   | Environmental samples | 2012              | Ireland      |
| GCA_030025815.1 | 375 | PIF environment       | 2023              | Ireland      |
| GCA_030023565.1 | 1   | PIF environment       | 2018              | Ireland      |
| GCA_030024135.1 | 1   | PIF environment       | 2018              | Ireland      |
| GCA_030023545.1 | 1   | PIF environment       | 2012              | Ireland      |
| CFS1161         | 1   | Environmental samples | 2012              | Ireland      |
| CFS1159         | 1   | Environmental samples | 2012              | Ireland      |
| CFS1157         | 1   | Environmental samples | 2012              | Ireland      |
| CFS1156         | 1   | Environmental samples | 2012              | Ireland      |
| CFS1158         | 1   | Environmental samples | 2012              | Ireland      |
| GCF_013186145.1 | 260 | PIF                   | 2010              | China        |
| GCA_002977835.1 | 136 | food                  | 2007              | China        |
| GCF_002532395.1 | 136 | nut                   | 2011              | South Korea  |
| GCA_002977355.1 | 136 | food                  | 2012              | China        |

|                 |     |                                                                        |      |             |
|-----------------|-----|------------------------------------------------------------------------|------|-------------|
| GCA_000263215.1 | 125 | ground whole grains                                                    | 2012 | South Korea |
| GCA_008119835.1 | 458 | PIF                                                                    | 2009 | Israel      |
| GCA_024176145.1 | 233 | environmental sample                                                   | 2014 | USA         |
| GCA_013186285.1 | 259 | PIF                                                                    | 2009 | China       |
| GCA_003207495.1 | 21  | Clinical                                                               | 2006 | Canada      |
| GCA_002974635.1 | 21  | sodium caseinate                                                       | 2005 | USA         |
| GCA_002977435.1 | 475 | food                                                                   | 2015 | China       |
| GCA_011605645.1 | 188 | PIF                                                                    | 2018 | China       |
| GCA_002532375.1 | 93  | barely                                                                 | 2009 | South Korea |
| GCA_002532355.1 | 73  | dried seaweed                                                          | 2009 | South Korea |
| GCA_030125795.1 | 73  | Clinical                                                               | 2011 | Switzerland |
| GCA_013186045.1 | 31  | Clinical                                                               | 2012 | China       |
| GCA_003207405.1 | 375 | Clinical                                                               | 2005 | Poland      |
| GCA_003207775.1 | 375 | Clinical                                                               | 2005 | Poland      |
| GCA_003206415.1 | 375 | Clinical                                                               | 2006 | New zealand |
| GCA_003207055.1 | 375 | Clinical                                                               | 2006 | New zealand |
| GCA_027667165.1 | 256 | stool                                                                  | 2014 | China       |
| GCA_002976815.1 | 58  | food                                                                   | 2016 | China       |
| GCA_002942405.1 | 148 | Carrot                                                                 | 2005 | USA         |
| GCF_002071765.2 | 4   | environmental swab sponge powder infant formula manufacturing facility | 2011 | Switzerland |
| GCA_003062265.1 | 83  | environmental                                                          | 2006 | USA         |
| GCA_003206395.1 | 42  | Clinical                                                               | 2005 | Poland      |
| GCA_013186205.1 | 269 | PIF                                                                    | 2010 | China       |
| GCA_023239145.1 | 334 | cat food                                                               | 2021 | USA         |
| GCA_023239165.1 | 334 | cat food                                                               | 2021 | USA         |
| GCA_023231675.1 | 334 | cat food                                                               | 2021 | USA         |
| GCA_023239105.1 | 334 | cat food                                                               | 2021 | USA         |
| CFS1304         | 99  | Casein Powder                                                          | 2011 | Ireland     |
| CFS1370         | 99  | Casein powder                                                          | 2011 | Ireland     |
| CFS1362         | 4   | PIF                                                                    | 2011 | Ireland     |
| GCA_002977275.1 | 37  | food                                                                   | 2012 | China       |
| GCA_022618495.1 | 40  | environmental swab sponge                                              | 2022 | USA         |
| GCA_029300235.1 | 40  | environmental swab sponge                                              | 2023 | USA         |
| GCA_000698225.1 | 40  | swab from food processing facility                                     | 2008 | Ireland     |
| GCA_013186185.1 | 40  | PIF                                                                    | 2009 | China       |
| CFS1176         | 40  | Environmental samples                                                  | 2012 | Ireland     |

|                 |     |                 |      |                 |
|-----------------|-----|-----------------|------|-----------------|
| GCA_013421565.1 | 8   | Stool           | 2019 | China           |
| GCA_002977955.1 | 226 | food            | 2012 | China           |
| GCA_013186325.1 | 8   | PIF             | 2009 | China           |
| GCA_003206925.1 | 13  | Clinical        | 2006 | France          |
| GCA_003207115.1 | 13  | Clinical        | 2006 | France          |
| GCA_003206905.1 | 13  | Clinical        | 2005 | New<br>zealand  |
| GCA_003207755.1 | 13  | Clinical        | 2005 | New<br>zealand  |
| GCA_003207005.1 | 13  | Clinical        | 2006 | New<br>zealand  |
| GCA_003206445.1 | 13  | Clinical        | 2005 | New<br>zealand  |
| GCA_003206985.1 | 13  | Clinical        | 2006 | USA             |
| GCA_023805435.1 | 184 | PIF             | 2021 | China           |
| GCA_017844945.1 | 64  | Soil            | 2016 | China           |
| GCA_001735615.2 | 64  | environmental   | 2015 | Germany         |
| GCA_002107825.1 | 64  | Spice           | 2008 | Jordan          |
| GCA_009938585.1 | 722 | water           | 2011 | China           |
| GCA_013186295.1 | 22  | PIF             | 2009 | China           |
| GCA_023687285.1 | 4   | environmental   | 2022 | USA             |
| GCF_003206935.1 | 4   | Clinical        | 2006 | New<br>zealand  |
| GCA_028576695.1 | 4   | Noodle          | 2010 | China           |
| CFS1297         | 4   | Curd            | 2011 | Ireland         |
| CFS1322         | 4   | PIF             | 2011 | Ireland         |
| CFS1328         | 99  | PIF             | 2011 | Ireland         |
| CFS1377         | 4   | Curd            | 2011 | Ireland         |
| GCA_030026105.1 | 4   | PIF environment | 2018 | Ireland         |
| GCA_003207145.1 | 4   | Clinical        | 2006 | Italy           |
| GCA_016076265.1 | 4   | PIF             | 2011 | USA             |
| GCA_027277245.1 | 4   | PIF             | 2017 | Switzerlan<br>d |
| GCA_027277185.1 | 4   | PIF             | 2022 | Switzerlan<br>d |
| GCF_027277175.1 | 4   | PIF             | 2012 | Switzerlan<br>d |
| GCA_028577215.1 | 4   | Stool           | 2013 | China           |
| GCA_003207575.1 | 4   | Clinical        | 2006 | New<br>zealand  |
| GCA_022648965.1 | 4   | Clinical        | 2010 | USA             |
| GCA_028577195.1 | 4   | Noodle          | 2012 | China           |
| GCA_028577555.1 | 4   | Noodle          | 2012 | China           |
| GCF_025345545.1 | 4   | food            | 2020 | China           |

|                 |   |                                                                        |      |             |
|-----------------|---|------------------------------------------------------------------------|------|-------------|
| GCA_020869275.1 | 4 | food                                                                   | 2018 | China       |
| GCA_015353895.1 | 4 | environmental swab sponge powder infant formula manufacturing facility | 2015 | Germany     |
| GCA_002942225.1 | 4 | instant oatmeal with strawberries and cream                            | 2005 | USA         |
| GCA_027277105.1 | 4 | PIF                                                                    | 2022 | Switzerland |
| GCA_027277125.1 | 4 | PIF                                                                    | 2019 | Switzerland |
| GCA_028577115.1 | 4 | Rice Noodle of Infant                                                  | 2012 | China       |
| GCA_030126705.1 | 4 | Clinical                                                               | 2015 | Israel      |
| GCA_001277275.1 | 4 | Milk                                                                   | 1980 | UK          |
| GCA_013186115.1 | 4 | PIF                                                                    | 2011 | China       |
| GCA_002075735.1 | 4 | environmental swab sponge powder infant formula manufacturing facility | 2012 | Switzerland |
