# Supplementary material for: Comprehensive Genomic Characterization of Cronobacter sakazakii Isolates from Infant Formula Processing Facilities Using Whole-Genome Sequencing
Source: MDPI journal article supplement (doi:10.3390/microorganisms11112749), 2023-11-11
Supplement: s1 [file s1]

**Supplementary Table S4.** Antibiotic resistance class patterns of *C. sakazakii* strains isolated from PIF processing plants.

| Gene name   | Resistance Patterns                                                                                                                          | Numbers class of antibiotics | No of isolates |
|-------------|----------------------------------------------------------------------------------------------------------------------------------------------|------------------------------|----------------|
| acrA        | Tetracycline / Phenicol/cephalosporin/rifamycin /disinfecting agents and antiseptics,/penam,/glycylcycline/fluoroquinolon                    |                              | n=19           |
| acrB        | Tetracycline/rifamycin/glycylcycline/penam/phenicol/cephalosporin/disinfecting agents and antiseptics/fluoroquinolone                        |                              | n=19           |
| acrR        | Tetracycline/glycylcycline/phenicol /cephalosporin/disinfecting agents and antiseptics/rifamycin/penam/fluoroquinolone                       | n=8                          | n=1            |
| AcrAB-TolC  | Tetracycline/phenicol/rifamycin/cephalosporin/glycylcycline/penam/disinfecting agents and antiseptics/fluoroquinolone antibiotic             |                              | n=3            |
| marR        | Tetracycline /glycylcycline/disinfecting agents and antiseptics/phenicol antibiotic/penam/rifamycin antibiotic/cephalosporin/fluoroquinolone |                              | n=19           |
| AcrAD-TolC  | Aminoglycoside                                                                                                                               |                              | n=17           |
| acrD        | Aminoglycoside                                                                                                                               |                              | n=19           |
| aadA        | Aminoglycoside                                                                                                                               |                              | n=1            |
| emrA        | Fluoroquinolone                                                                                                                              |                              | n=19           |
| emrB        | Fluoroquinolone                                                                                                                              |                              | n=19           |
| emrR        | Fluoroquinolone                                                                                                                              |                              | n=19           |
| gyrA        | Fluoroquinolone                                                                                                                              |                              | n=19           |
| MarB        | Fluoroquinolone                                                                                                                              |                              | n=19           |
| EmrAB-TolC  | Fluoroquinolone                                                                                                                              |                              | n=19           |
| MacA        | Macrolide antibiotic                                                                                                                         |                              | n=19           |
| mdtA        | Aminocoumarin antibiotic                                                                                                                     |                              | n=19           |
| mdtB        | Aminocoumarin antibiotic                                                                                                                     | n=1                          | n=19           |
| mdtH        | Aminocoumarin antibiotic                                                                                                                     |                              | n=19           |
| MdtABC-TolC | Aminocoumarin antibiotic                                                                                                                     |                              | n=19           |
| QacE        | disinfecting agents and antiseptics                                                                                                          |                              | n=1            |
| SugE        | quaternary ammonium compounds                                                                                                                |                              | n=19           |
| Tet(A)      | Tetracycline                                                                                                                                 |                              | n=1            |
| tetC        | Tetracycline                                                                                                                                 |                              | n=2            |
| YojI        | Microcin(peptide antibiotic)                                                                                                                 |                              | n=1            |
| BcrC        | bacitracin(peptide antibiotic)                                                                                                               |                              | n=19           |
| FosA        | phosphonic acid                                                                                                                              |                              | n=19           |
| GlpT        | phosphonic acid                                                                                                                              |                              | n=19           |
| sul1        | sulfonamide antibiotic                                                                                                                       |                              | n=1            |
| AcrEF-TolC  | Fluoroquinolone/penam/cephamycin/cephalosporin                                                                                               |                              | n=18           |
| acrF        | Fluoroquinolone/penam/cephamycin/cephalosporin                                                                                               | n=4                          | n=19           |
| TEM-1       | Penam/penem/cephalosporin/monobactam                                                                                                         |                              | n=1            |
| AcrZ        | Tetracycline/penam/disinfecting agents and antiseptics/ glycylcycline/rifamycin/phenicol/carbapenem/cephalosporin/monobactam/ceph            | n=11                         | n=19           |
| MarA        | ha-mycin/fluoroquinolone antibiotic                                                                                                          |                              | n=19           |

|          |                                                                                                                                                                            |     |      |
|----------|----------------------------------------------------------------------------------------------------------------------------------------------------------------------------|-----|------|
|          | Tetracycline/penam/disinfecting agents and antiseptics/<br>glycylcycline/rifamycin/phenicol /carbapenem/<br>cephalosporin/monobactam/cephamycin/fluoroquinolone antibiotic |     |      |
| baeR     | Aminocoumarin/Aminoglycoside                                                                                                                                               |     | n=19 |
| cpxA     | Aminocoumarin/Aminoglycoside                                                                                                                                               |     | n=19 |
| CRP      | Macrolide/ Fluoroquinolones                                                                                                                                                | n=2 | n=19 |
| mdfA     | Aminoglycoside/Cephalosporin                                                                                                                                               |     | n=19 |
| MdfA/Cmr | Disinfecting agents and antiseptics/Tetracycline                                                                                                                           |     | n=19 |
| H-NS     | Macrolide/Tetracycline/penam/cephalosporin/fluoroquinolone/cephamyc-in                                                                                                     | n=6 | n=19 |
