# Supplementary material for: Comprehensive Genomic Characterization of Cronobacter sakazakii Isolates from Infant Formula Processing Facilities Using Whole-Genome Sequencing
Source: MDPI journal article supplement (doi:10.3390/microorganisms11112749), 2023-11-11
Supplement: s1 [file s1]

**Supplementary Table S3:** Assignment of accession numbers to virulence genes in the study *C. sakazakii* isolates

| Virulence genes | Accession number |
|-----------------|------------------|
| cheY            | Q93P00           |
| cheZ            | P0A9H9           |
| clpB            | Q47101           |
| clpp            | NP_465991        |
| cspE            | P80434           |
| degP            | P0C0V1           |
| dksA            | P18274           |
| dnaJ            | Q60004           |
| dnaK            | P17821           |
| entA            | Q2MBK7           |
| entH            | Q2MBK4           |
| envZ            | P41406           |
| fepC            | P75724           |
| fepG            | J5VAW4           |
| fimB            | P04742           |
| fkpA            | O08437           |
| flgB            | P0ABW9           |
| flgG            | P0ABX5           |
| flgH            | B5FGS5           |
| flhA            | P35620           |
| flhc            | <u>Q86047</u>    |
| fliG            | A0A7U7FLF7       |
| fliM            | P06974           |
| fliP            | P54700           |
| fliQ            | P35535           |
| focA            | P0AC23           |
| greA            | P0A6W5           |
| grtA            | A0A0H2ZDG5       |
| hfq             | P0A6X3           |
| hsIT            | A0A0T9LQV8       |
| ibpA            | Q6CYV2           |
| IppA            | Q2LAM2           |
| kdsA            | A0A8E1QP66       |
| leuO            | P10151           |
| manB            | Q5B833           |
| motA            | Q53174           |
| nanA            | P62576           |
| ompA            | P24017           |
| phoP            | P23836           |
| relB            | P0C079           |
| Rpos            | P13445           |
| slyA            | P40676           |
| speA            | P21170           |
| surA            | P0ABZ6           |
| trKA            | P0AGI8           |
| Vc0243          | L0GAG6           |
