# Supplementary material for: Comprehensive Genomic Characterization of Cronobacter sakazakii Isolates from Infant Formula Processing Facilities Using Whole-Genome Sequencing
Source: MDPI journal article supplement (doi:10.3390/microorganisms11112749), 2023-11-11
Supplement: s1 [file s1]

**Supplementary Table S1.** Feature of the sequenced draft genomes assembled with SPAdes and quality checked with Quast.

| Isolate | Total length (bp) | #Contigs | N50    | L50 | ST | G+C content (%) | CDSs (bp) | Accession number |
|---------|-------------------|----------|--------|-----|----|-----------------|-----------|------------------|
| CFS1154 | 4542213           | 50       | 199872 | 8   | 1  | 56.7            | 4446777   | JAWLKX000000000  |
| CFS1155 | 4556805           | 39       | 260217 | 7   | 1  | 56.69           | 4455968   | JAWLKW000000000  |
| CFS1156 | 4640775           | 61       | 232291 | 7   | 1  | 56.69           | 4509936   | JAWLSK000000000  |
| CFS1157 | 4641177           | 66       | 211383 | 8   | 1  | 56.7            | 4542177   | JAWLSJ000000000  |
| CFS1158 | 4612695           | 66       | 211383 | 8   | 1  | 56.7            | 4583034   | JAWLKV000000000  |
| CFS1159 | 4609363           | 65       | 195298 | 7   | 1  | 56.69           | 4547080   | JAWLKU000000000  |
| CFS1160 | 4542966           | 46       | 203518 | 7   | 1  | 56.76           | 4463582   | JAWLKT000000000  |
| CFS1161 | 4621986           | 361      | 230205 | 61  | 1  | 56.35           | 4612327   | JAWLSI000000000  |
| CFS1169 | 4572077           | 173      | 651609 | 24  | 1  | 56.6            | 4502144   | JAWLSH000000000  |
| CFS1297 | 4531883           | 44       | 166921 | 8   | 4  | 56.67           | 4504511   | JAWLKN000000000  |
| CFS1304 | 4420999           | 40       | 267914 | 7   | 99 | 57.05           | 4356816   | JAWLKO000000000  |
| CFS1322 | 4621902           | 51       | 265761 | 6   | 4  | 56.7            | 4564789   | JAWLKQ000000000  |
| CFS1328 | 4614795           | 56       | 224690 | 8   | 4  | 56.49           | 4609599   | JAWLKP000000000  |
| CFS1362 | 4603160           | 86       | 253680 | 7   | 99 | 56.76           | 4569007   | JAWLKM000000000  |
| CFS1370 | 4425465           | 20       | 601557 | 3   | 99 | 57.06           | 4225455   | JAWLKL000000000  |
| CFS1377 | 4508875           | 49       | 152844 | 9   | 4  | 56.69           | 4448610   | JAWLKK000000000  |
| CFS2786 | 4748603           | 212      | 222391 | 8   | 1  | 56.59           | 4698933   | JAWLKS000000000  |
| CFS2788 | 4652879           | 85       | 222391 | 8   | 1  | 56.6            | 4632748   | JAWLKR000000000  |
